# Supplementary material
Source: PubMed Central journal article supplement (PMC2359780)
Supplement: 0802157105_Supplemental_PDF.pdf [file 0802157105_Supplemental_PDF.pdf]

# Supporting Information

Eitas *et al.* 10.1073/pnas.0802157105

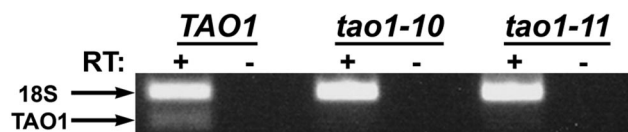

**Fig. S1.** *tao1-10* and *tao1-11* lines are transcript nulls. (Lower) Leaf RNA from various plants lines was subject to RT-PCR analysis for the *TAO1* transcript. (Upper) Equivalent amounts of template cDNA loading shown by 18S control primer band. RT + or - indicates the presence or absence of reverse transcriptase in the cDNA synthesis reaction step. This experiment is representative of two independent replicates.

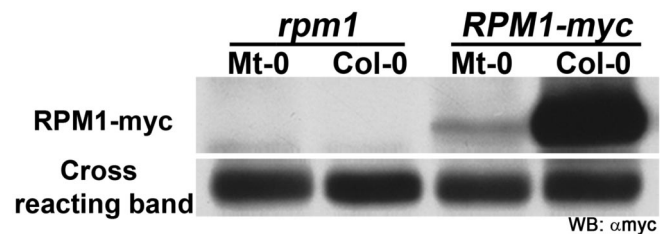

**Fig. S2.** Weak RPM1 function in Mt-0 is likely caused by low RPM1 accumulation. Western blot analysis showing RPM1-myc accumulation in various plant lines. The cross-reacting band serves as an indicator of equivalent amounts of total protein loaded. This experiment is indicative of two independent replicates. Note that we screened several independent transgenic Mt-0 lines for RPM1-myc accumulation and this was the highest level observed.

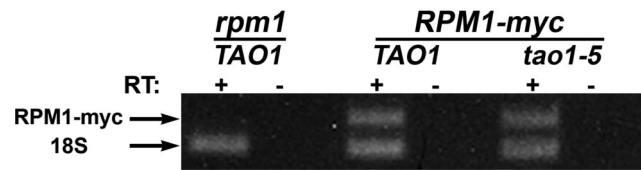

**Fig. S3.** The effect of *tao1-5* on RPM1 is posttranscriptional. Leaf RNA from various plants lines, genotypes above, was subjected to RT-PCR analysis for the *RPM1* transcript. Equivalent amounts of template cDNA loading shown by 18S control primer band. RT + or - indicates the presence or absence of reverse transcriptase in the cDNA synthesis reaction step. This experiment is representative of three independent replicates.

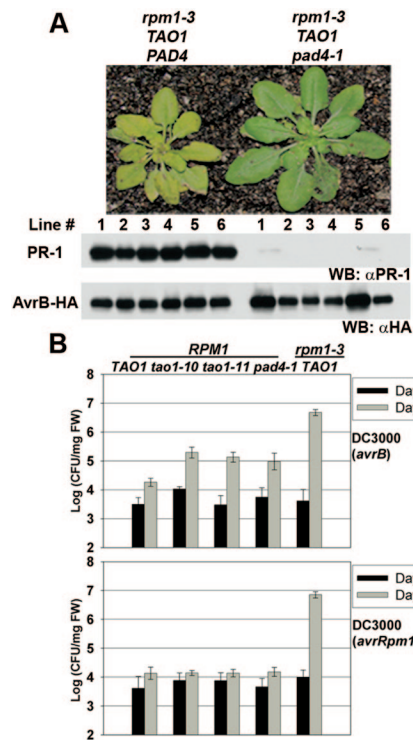

**Fig. S4.** TAO1 function is lost in a *pad4-1* background. (A) Six F2 *rpm1-3 pad4-1* lines containing the *DEX:avrB-HA* transgene were selected. The picture was taken 3 days after DEX treatment. Protein extracts (72 hpi) from six individual plants were subjected to Western blot analysis for both PR-1 and AvrB-HA. Equivalent amounts of total proteins were loaded in all lanes (data not shown). (B) Two- to three-week-old plants were dip-infiltrated with *Pto* DC3000(*avrB*) (Upper) or *Pto* DC3000(*avrRpm1*) (Lower) at a bacterial concentration of  $2.5 \times 10^7$  cfu/ml. Error bars represent the SD among four samples. This experiment is representative of three independent replicates.

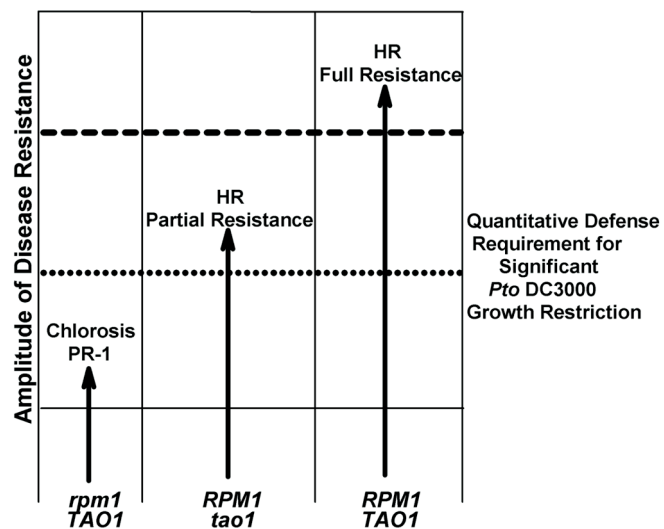

Fig. S5. RPM1 and TAO1 act additively for full disease resistance against *Pto* DC3000(*avrB*). A model for the additive function of TAO1 and RPM1. The x axis displays plant genotypes. The y axis represents the level of disease resistance.
